# Supplementary material for: Bacterial Respiration Used as a Proxy to Evaluate the Bacterial Load in Cooling Towers
Source: MDPI journal article supplement (doi:10.3390/s20216398), 2020-11-09
Supplement: s1 [file s1]

**Table S1.** Oxygen Respiration measurement setup.

|                                           |                                   |
|-------------------------------------------|-----------------------------------|
| OXSP5 sensor spot                         | PyroScience GmbH, Aachen, Germany |
| FireStingO2 Optical Oxygen Meter          | PyroScience GmbH, Aachen, Germany |
| Temperature probe                         | PyroScience GmbH, Aachen, Germany |
| One-meter long optical fiber (SPFIB-BARE) | PyroScience GmbH, Aachen, Germany |
| Lens spot adapter (SPADBAS)               | PyroScience GmbH, Aachen, Germany |
| Pyro Oxygen Logger software               | PyroScience GmbH, Aachen, Germany |
| Water vials (116 mL)                      |                                   |
| Glass magnet                              | Home made                         |
| Rubber stopper from butyl rubber          |                                   |
| Glass capillary                           |                                   |

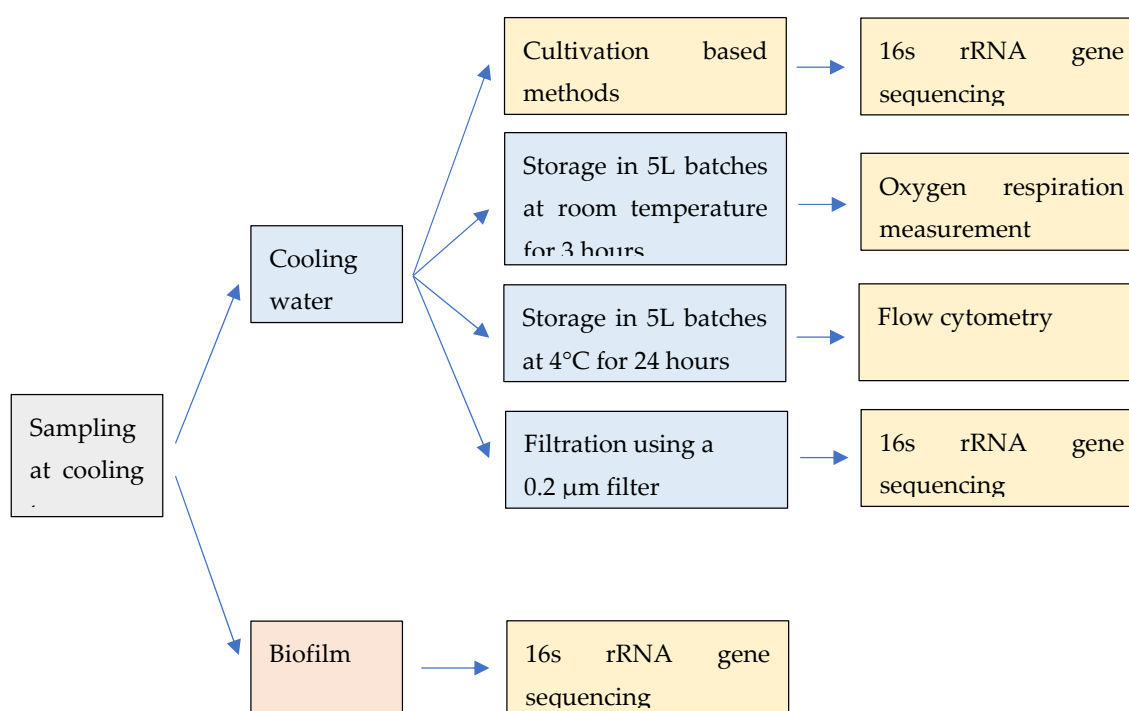

**Figure S1.** Flowchart visualising the respective analyses (in yellow) that were carried out for the sample obtained.
